# Supplementary material for: Up-Regulation of Insulin-Like Growth Factor-2 Promotes Cell Proliferation and Migration and is Associated with Bone Metastasis in Non Small Cell Lung Cancer.
Source: Research Square preprint supplement (doi:10.21203/rs.3.rs-750861/v1), 2021-08-09
Supplement: Supplementary file 1 [file 7144ea1751c257d0c34f3d53.xlsx]

## Sheet: antibody
name	Product code	Area
Anti-IGF2	ab9574	USA
Anti-IGF1R	ab131476	USA
Anti-IGF1R(phospho Y1161)	ab39398	USA
Anti-INSR(phospho Y1361)	ab60946	USA
Anti-INSR	ab137747	USA
Anti-AKTantibody	ab179463	USA
Anti-pAKT (phospho T308)	ab38449	USA
Anti-NFkB p65 antibody	ab16502	USA
Anti-pNFkB(phospho S536)	ab86299	USA
Anti-TRAP/CD40L	ab65854	USA
Anti-NFAT2	ab25916	USA
Anti-CTSK	ab187647	USA
Anti-Actin	ab179467	USA

## Sheet: primer
name	forward	reverse
CXCL9	ACCACATCCCACTCACAAC	GGCTTAGGACTTGCTGACAT
IGF2	CCCTGGACAATCAGACGAA	GTCGCAAACCGAACAGC
FABP4	AGCACCCTCCTGAAAACTG	GCAAAGCCCACTCCTACTT
CCL18	AGAAGGAGGCCAGGAGTT	GCAGACGAGGACAAGGAG
MUC21	GCAGTGAGTGAGGCGAAG	ACAGAAGAAGAGCCCAGCA
TFPI2	CAGGAAATAACGCGGAGAT	TCCCAGGTGTAGAAATTGTTG
BCL3	GGCACGTTGGACCTGGA	GCACGGTTTCTTGGCACTC
CD52	CAAGAGAATCCCCTCCATC	CCCCTATTTTGGCTGTTG
GPR50	CTGATCCTGAGCCTGCTG	GAGCCGGTGGGTATTCTG
CDH2	GCCTGGAACGCAGTGTA	GCTGTTTGGGTCGGTCT
TRAP	AGGTGCTTCGGTGTTTGT	GAAGACTCCCAGCGTCAG
CTSK	CCTGACCTCCTTCCAGTTT	TCCAGTGCTTGTTTCCCT
NFATC1	GGAGCAAGAGCCTGAGC	TTGGTGGGTGAGTAGTGGA
GAPDH	CCTTCCGTGTCCCCACT	GCCTGCTTCACCACCTTC
